# Supplementary material for: A Framework to Guide Undergraduate Education in Interdisciplinary Science
Source: Atypon-hosted journal article supplement (doi:10.1187/cbe.18-11-0226), 2019-05-23
Supplement: combinedsupmats.pdf [file combinedsupmats.pdf]

# **Supplemental Material**

*CBE—Life Sciences Education*

**Tripp and Shortlidge**

| <b>Category</b>            |                          | <b>n</b> | <b>Percentage (%)</b> |
|----------------------------|--------------------------|----------|-----------------------|
| Years at current position  | 5+ Years                 | 141      | 76.6                  |
|                            | 1-2 Year                 | 25       | 13.6                  |
|                            | <1 Year                  | 16       | 8.7                   |
|                            | No information           | 2        | 1.1                   |
| Gender                     | Male                     | 112      | 60.9                  |
|                            | Female                   | 68       | 37.0                  |
|                            | Non-Binary               | 2        | 1.1                   |
|                            | Unidentified             | 2        | 1.1                   |
| Institution Classification | Research                 | 114      | 62.0                  |
|                            | Master                   | 35       | 19.0                  |
|                            | Other                    | 12       | 6.5                   |
|                            | Baccalaureate            | 7        | 3.8                   |
|                            | Associate                | 5        | 2.7                   |
|                            | International University | 5        | 2.7                   |
|                            | Special Focus Profession | 5        | 2.7                   |
|                            | Funding agency           | 1        | 0.5                   |
| Department                 | Natural/Physical Science | 118      | 64.1                  |
|                            | Unidentified             | 33       | 17.9                  |
|                            | Computer Science         | 8        | 4.3                   |
|                            | Science Education        | 7        | 3.8                   |
|                            | Math                     | 4        | 2.2                   |
